# Supplementary material for: Actin assembly ruptures the nuclear envelope by prying the lamina away from nuclear pores and nuclear membranes in starfish oocytes
Source: eLife journal article supplement (doi:10.7554/elife.49774), 2020-01-28
Supplement: supp [file elife-49774-supp-v1.zip]

Archive with 5 entries (5 files):
- elife_poa_e49774_Figure_5_figure_supplement_1.pdf
- elife_poa_e49774_Figure_4_figure_supplement_3.jpg
- elife_poa_e49774_Figure_4_figure_supplement_1.jpg
- elife_poa_e49774_Transparent_Reporting_File.pdf
- elife_poa_e49774_Figure_4_figure_supplement_2.jpg
