# Supplementary figures and images for: Actin assembly ruptures the nuclear envelope by prying the lamina away from nuclear pores and nuclear membranes in starfish oocytes
Source: eLife journal article supplement (doi:10.7554/elife.49774), 2020-01-28

Figure S4.

A

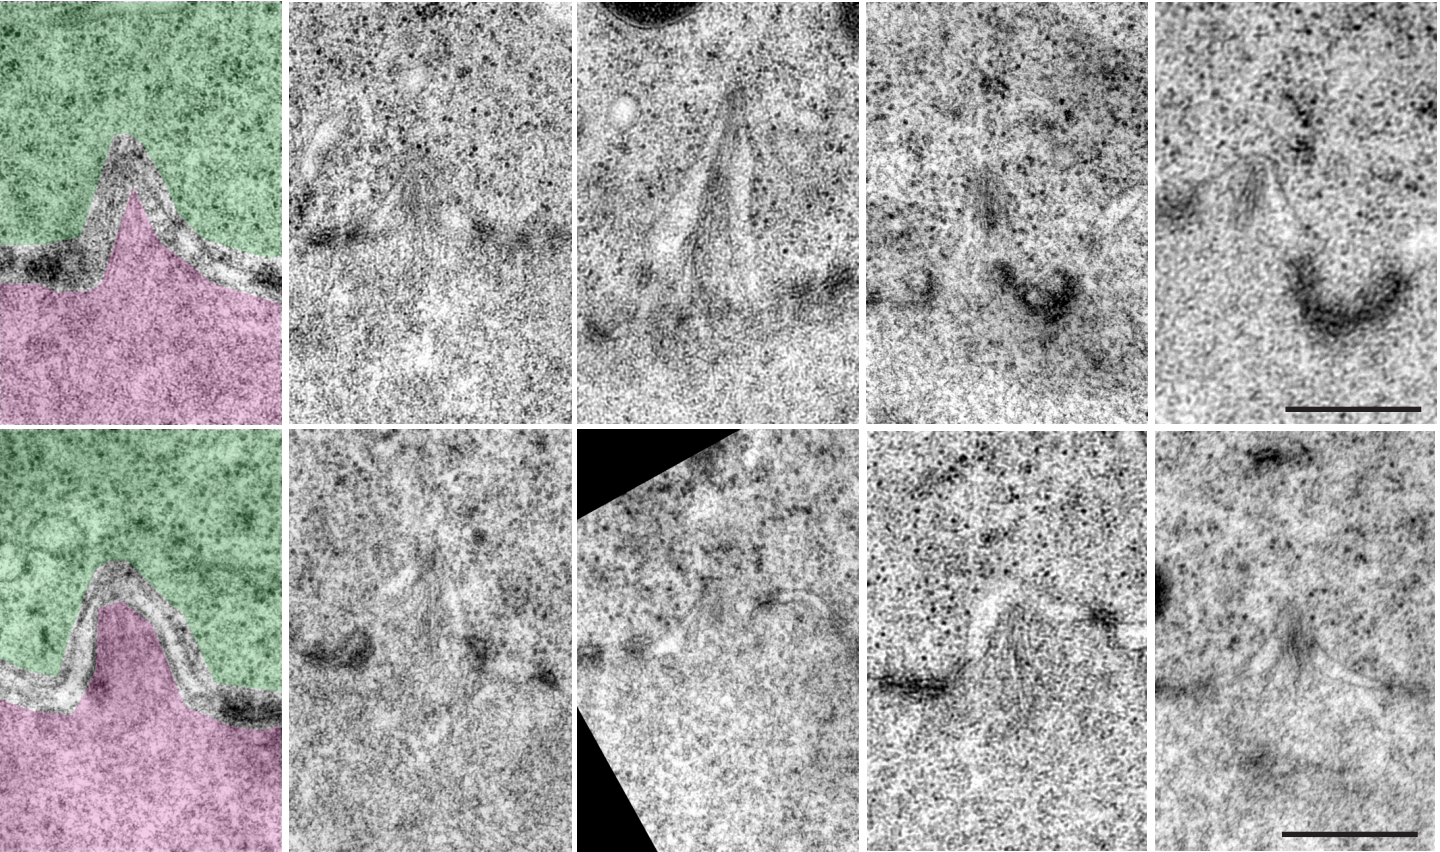

B

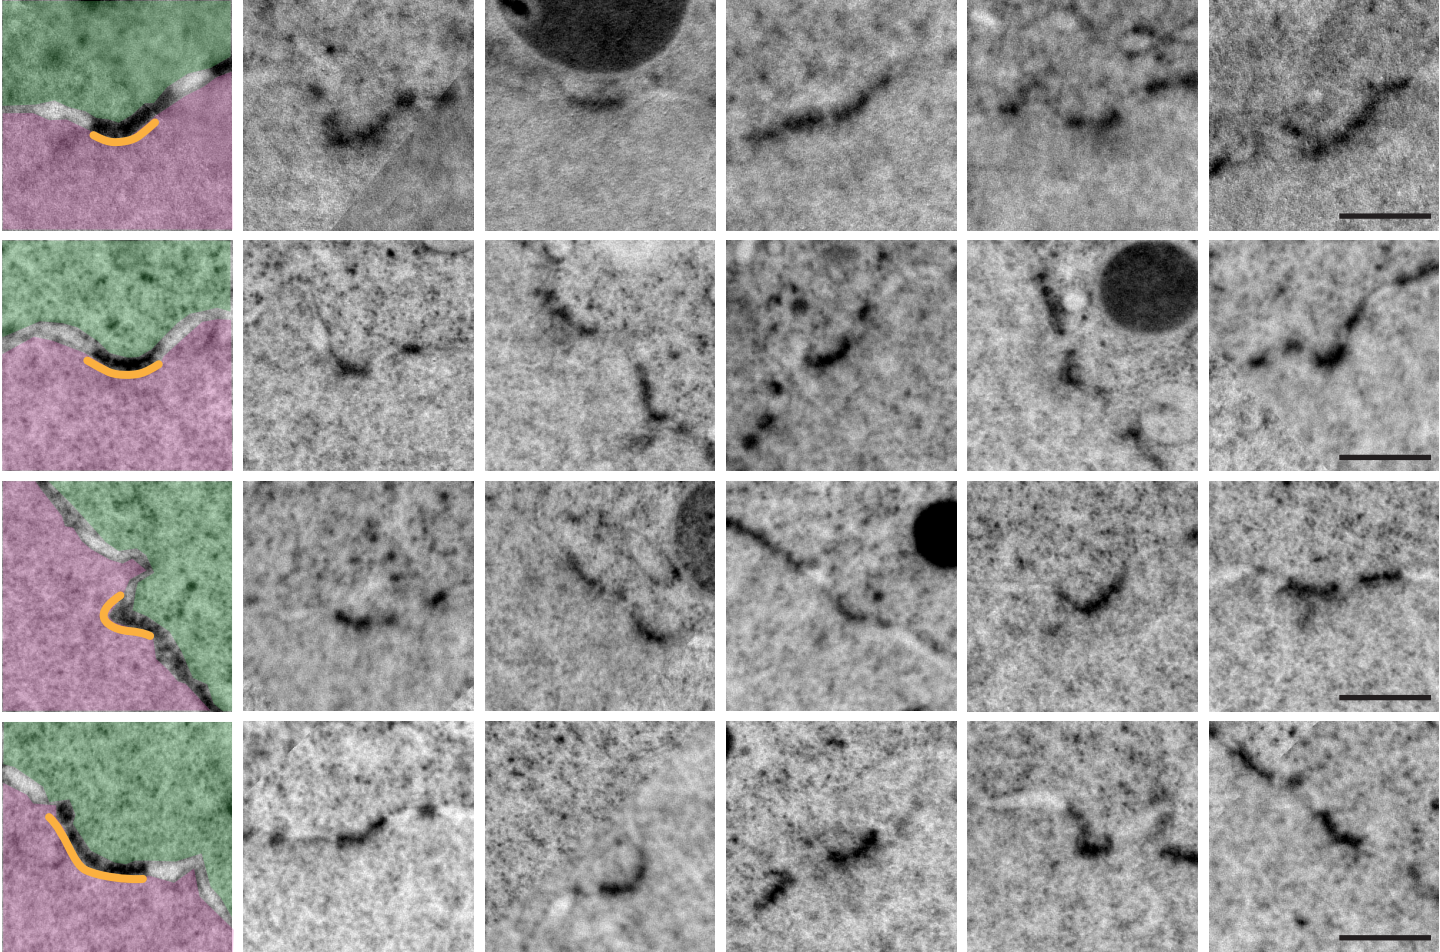

Supplement: supp [file elife-49774-supp-v1.zip › elife_poa_e49774_Figure_5_figure_supplement_1.pdf]

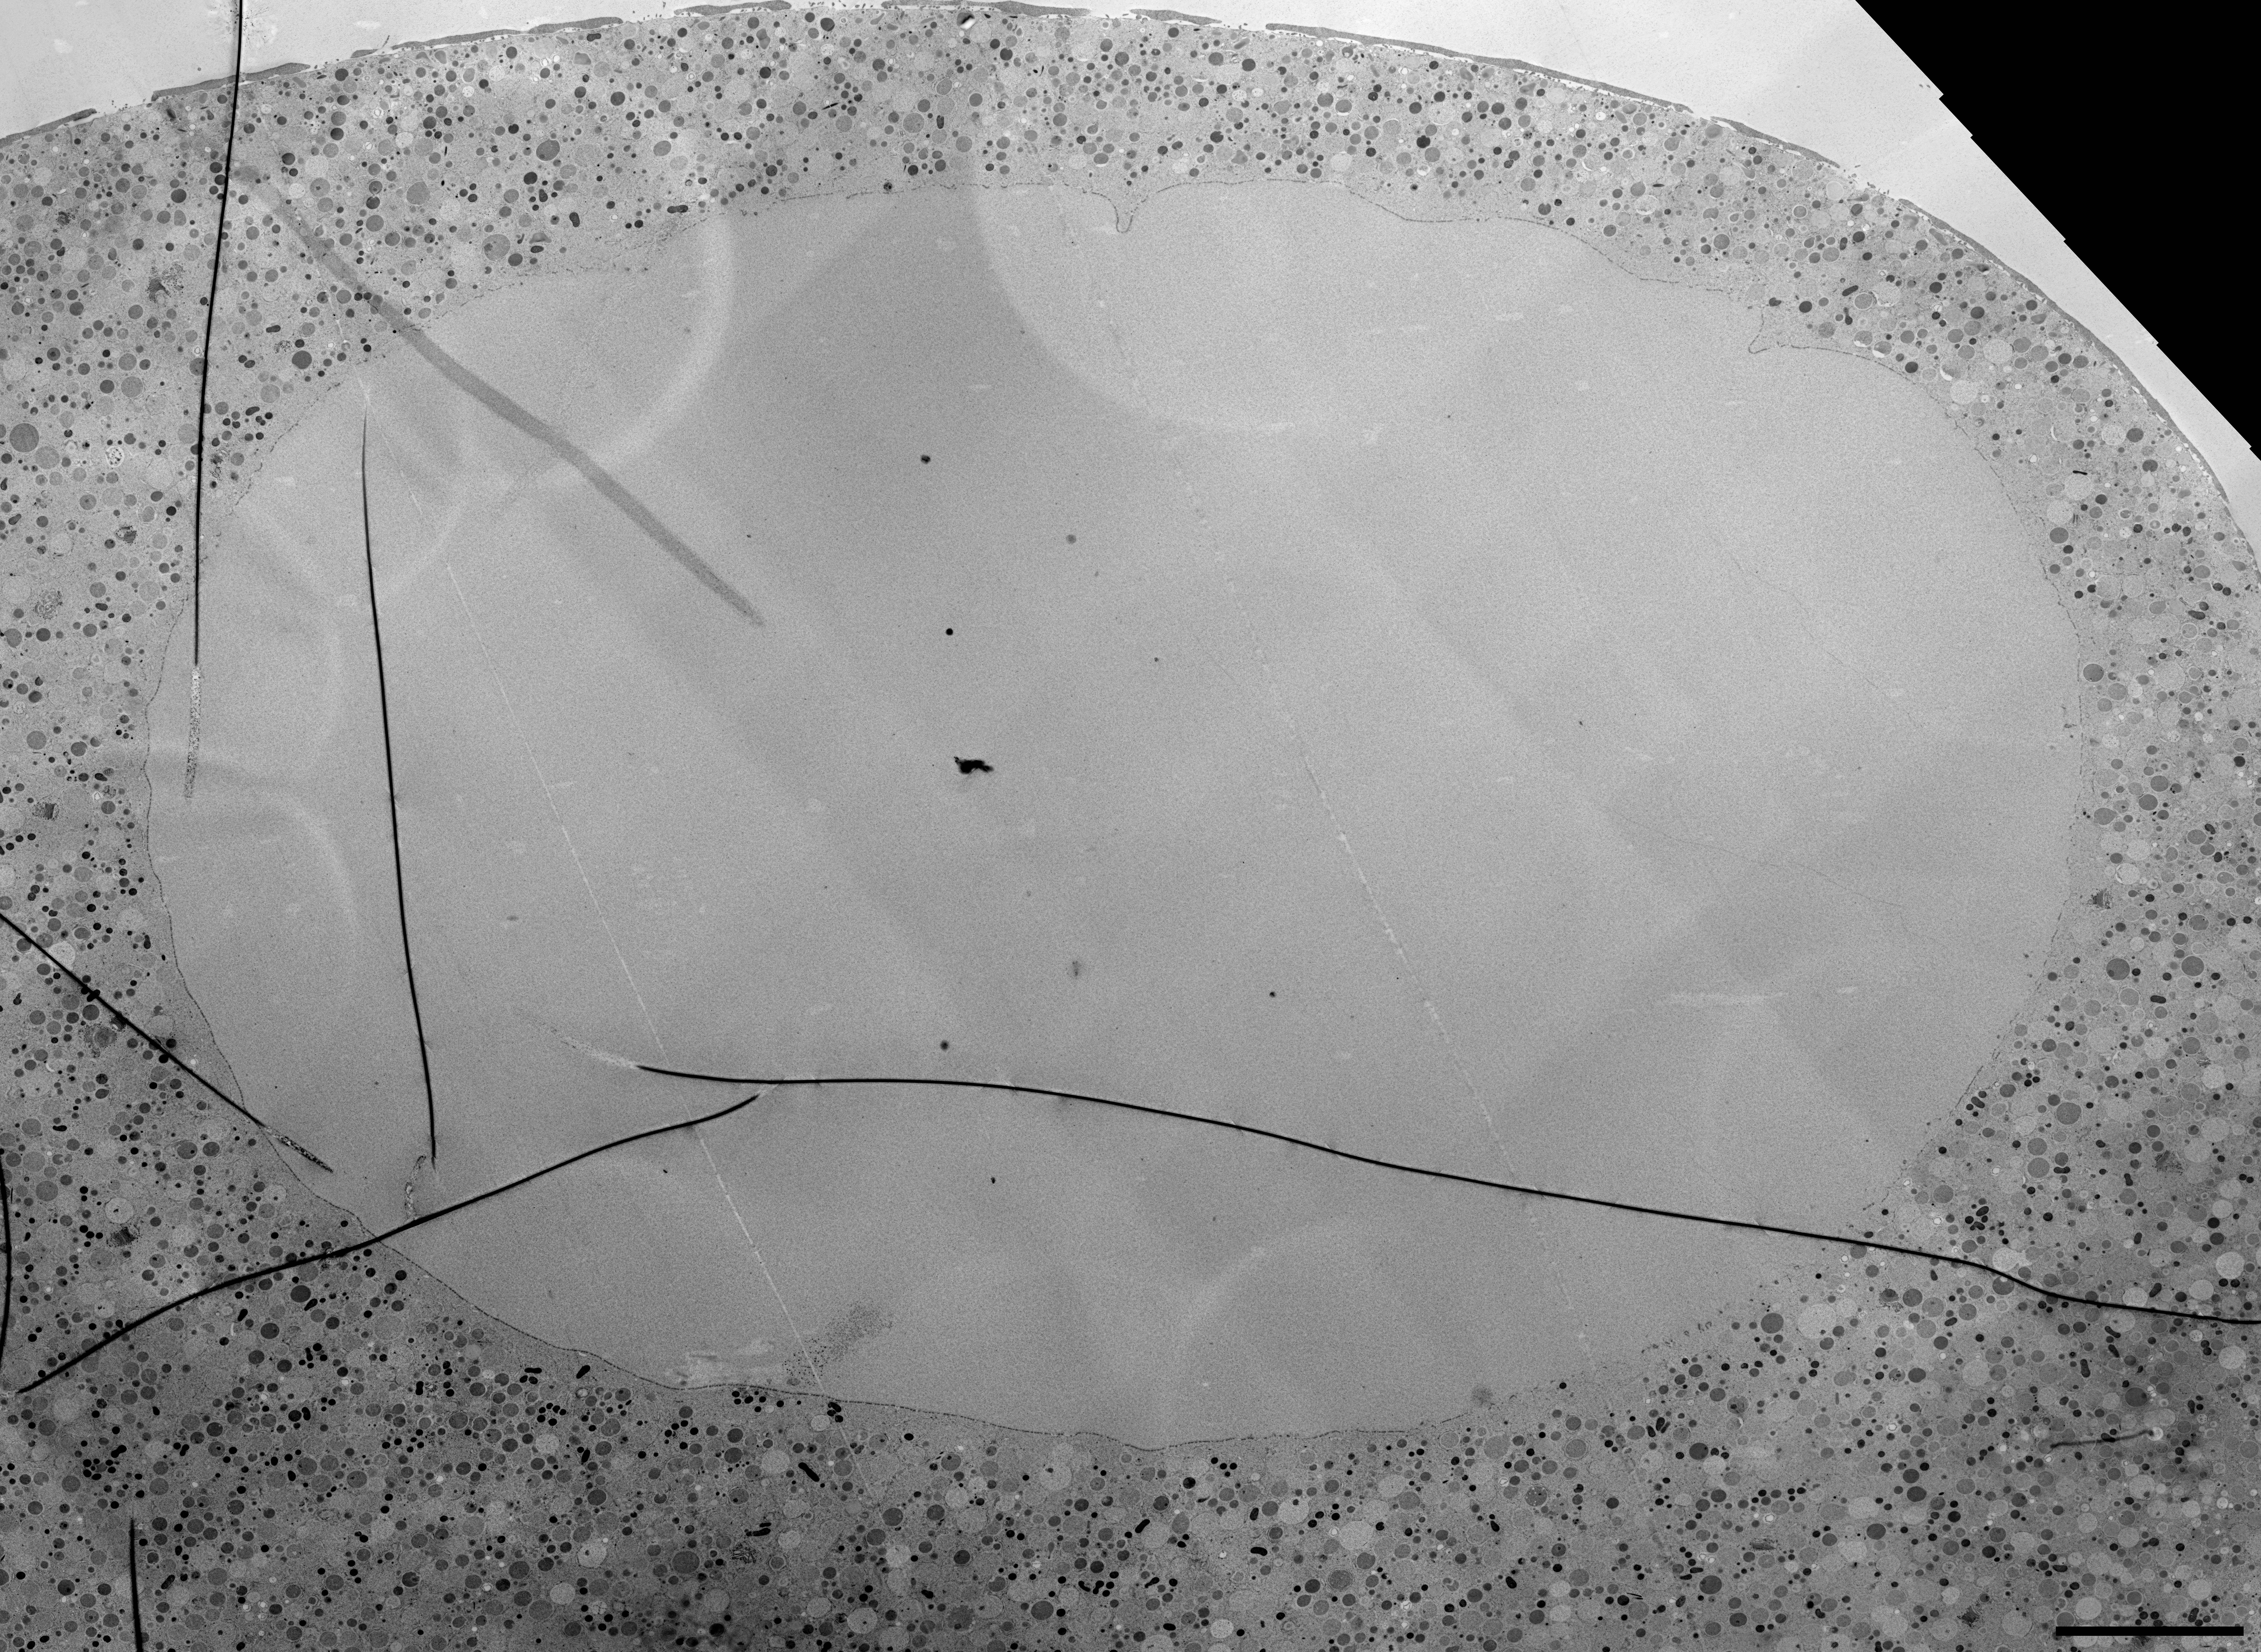

Supplement: supp [file elife-49774-supp-v1.zip › elife_poa_e49774_Figure_4_figure_supplement_3.jpg]

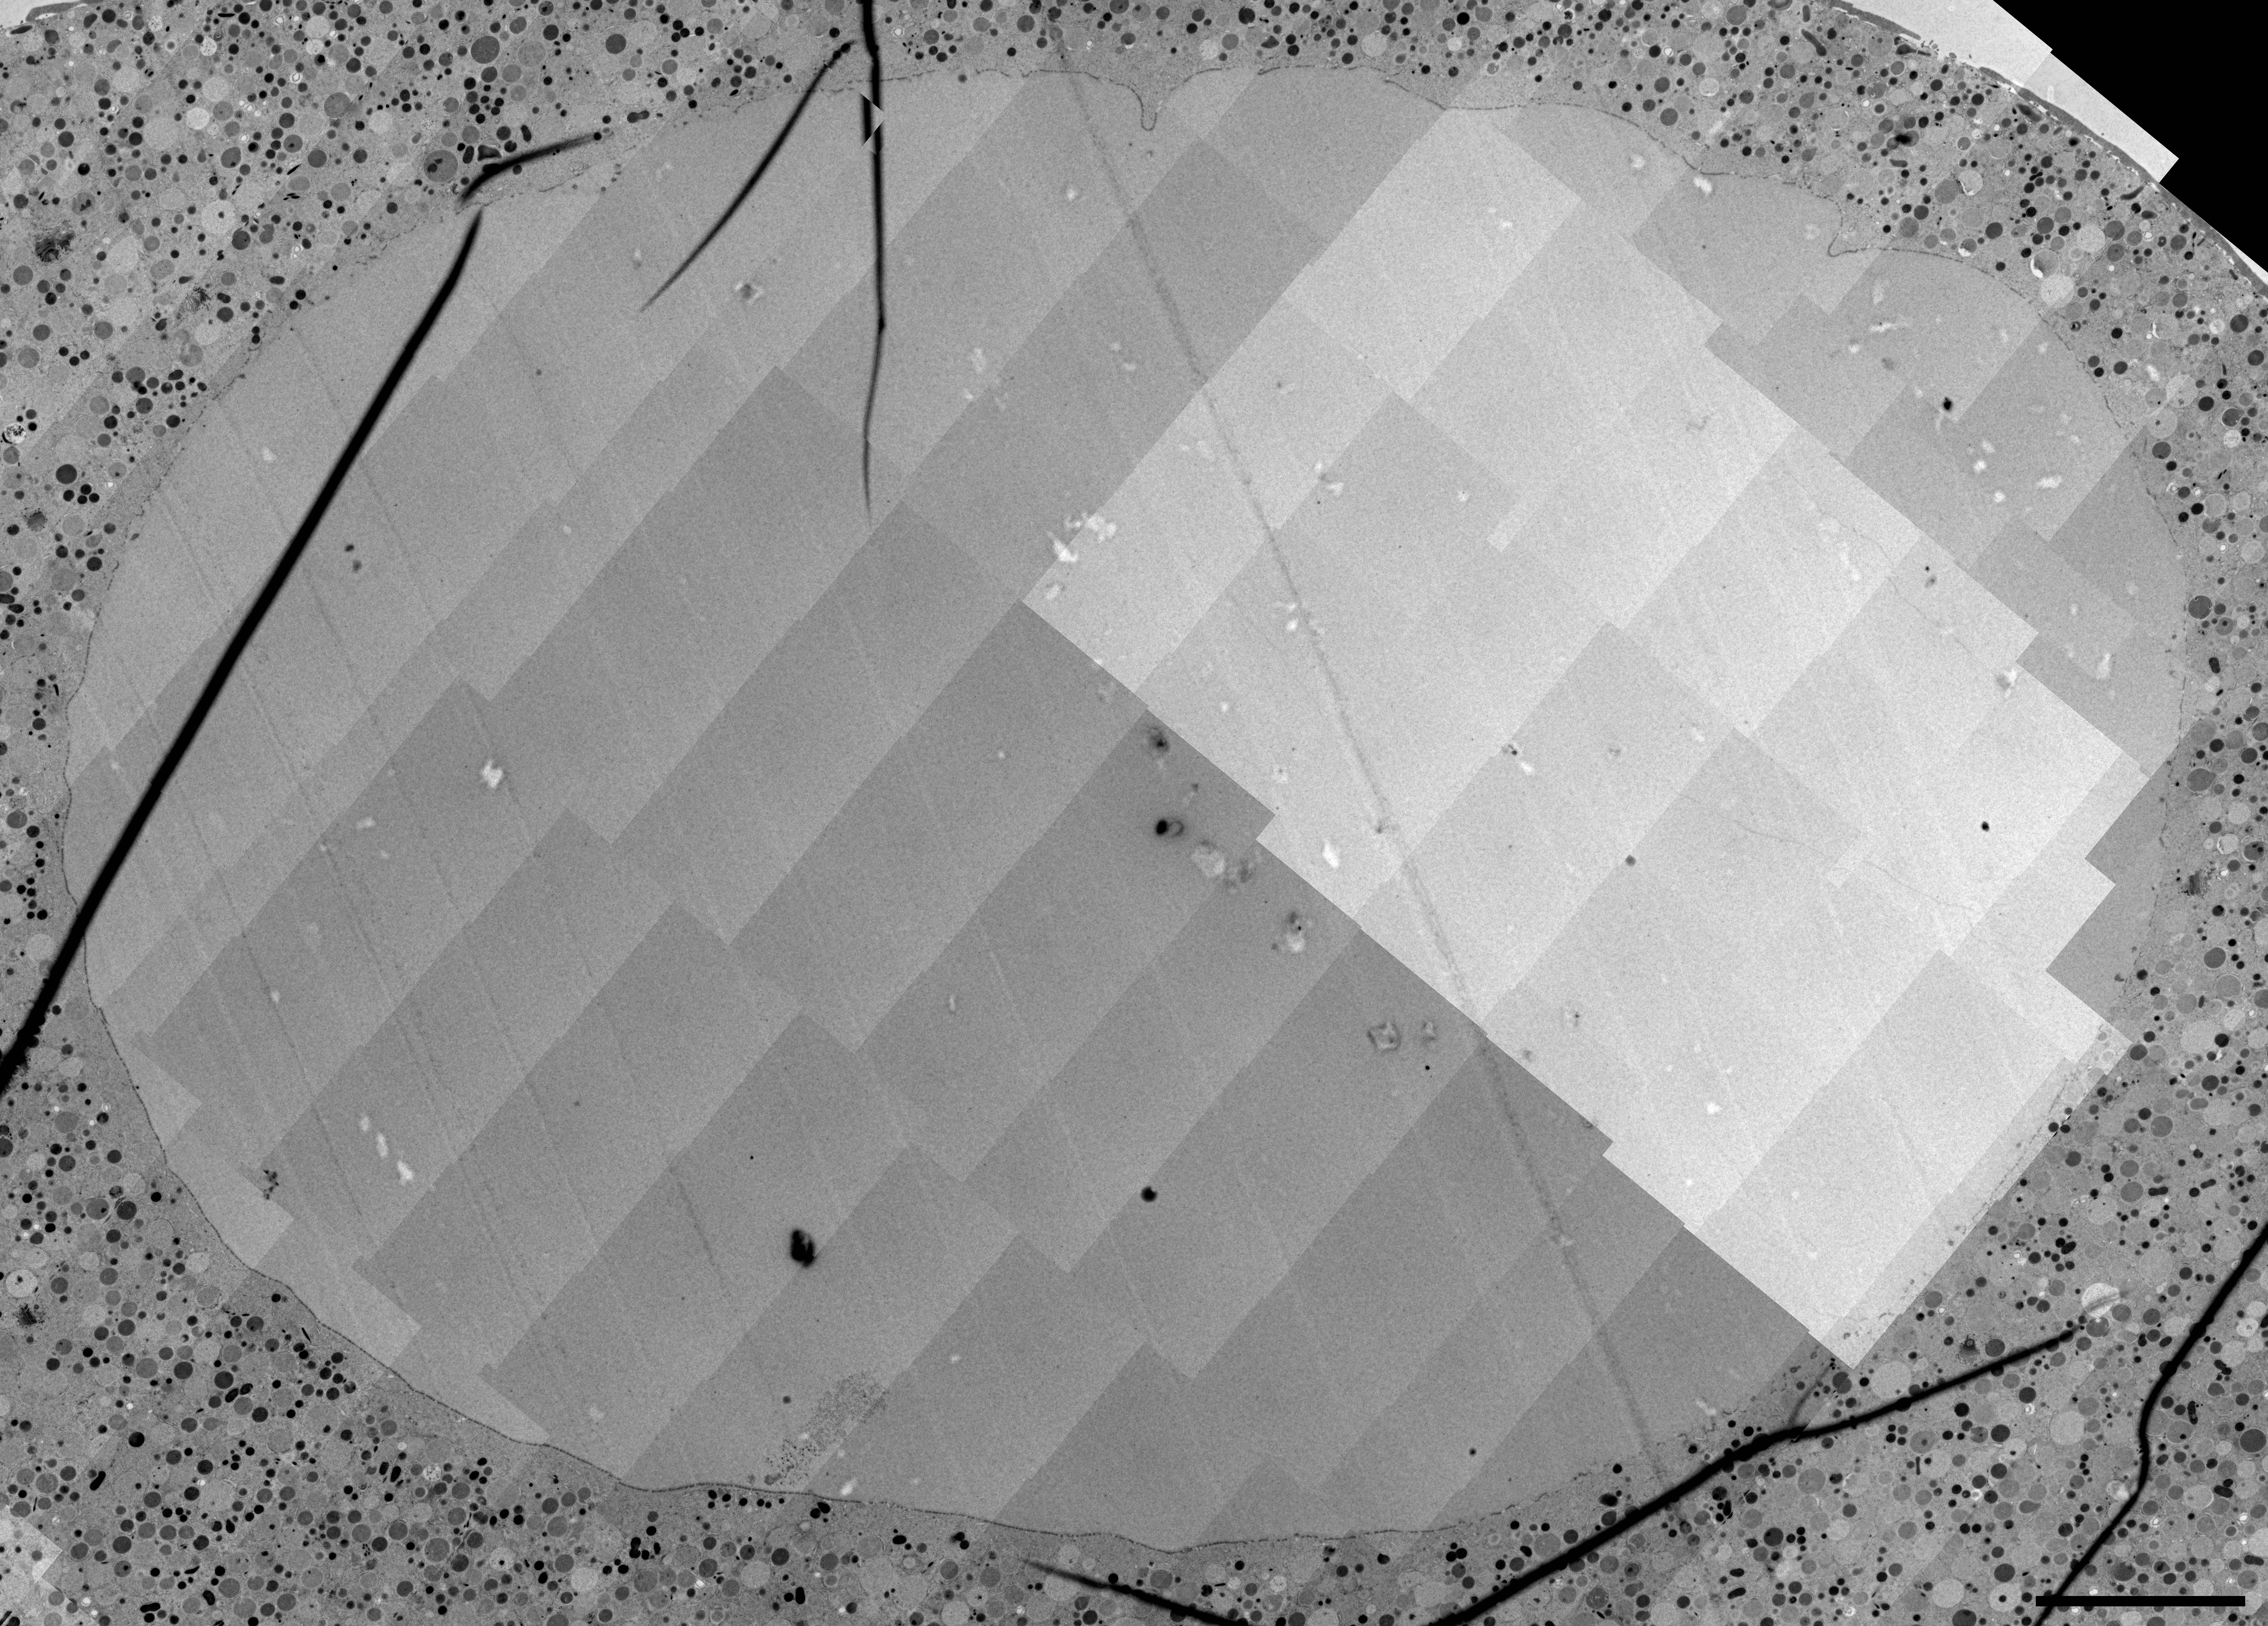

Supplement: supp [file elife-49774-supp-v1.zip › elife_poa_e49774_Figure_4_figure_supplement_2.jpg]
